# Supplementary material for: Depiction of secondary metabolites and antifungal activity of Bacillus velezensis DTU001
Source: bioRxiv or medRxiv preprint supplement (doi:10.1101/577817), 2019-08-02
Supplement: Supplementary file [file media-1.pdf]

## Supplementary Figures

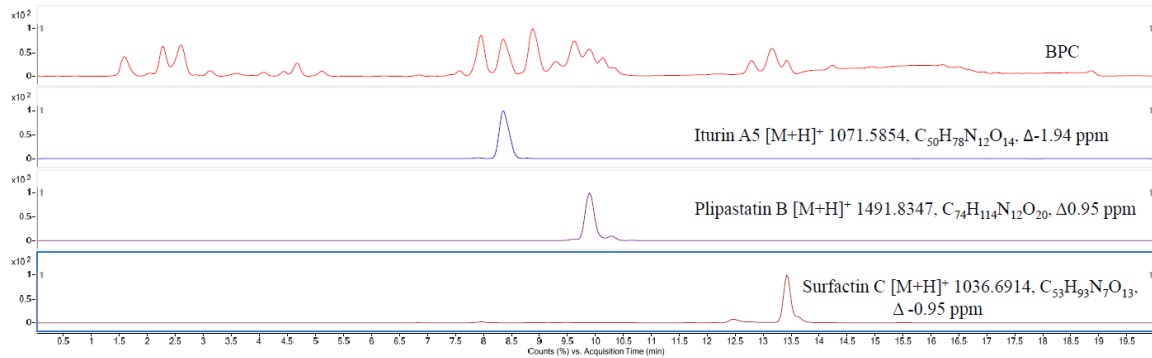

**Fig S1.** Detection of lipopeptides from *B. velezensis* DTU001 extract. Base Peak Chromatography of the crude extract (BPC, first line) and extracted ion chromatography indicating the presence of iturin A5 (second line), plipastatin B (third line) and surfactin C (fourth line).

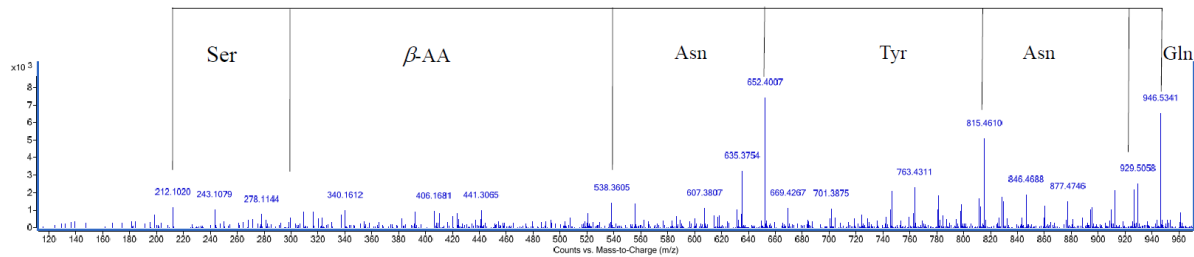

**Fig S2.** MS/MS fragmentation for iturin A5.

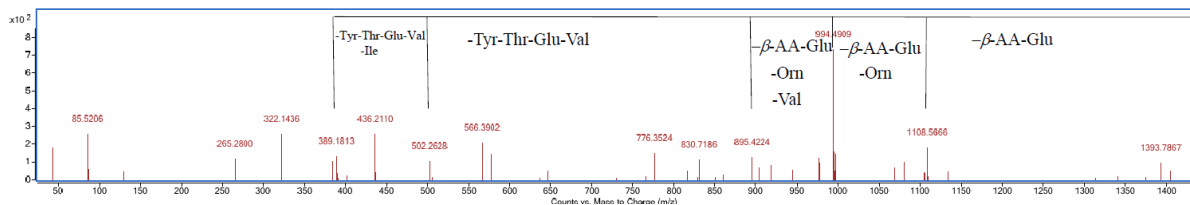

**Fig S3.** MS/MS fragmentation for plipastatin B.

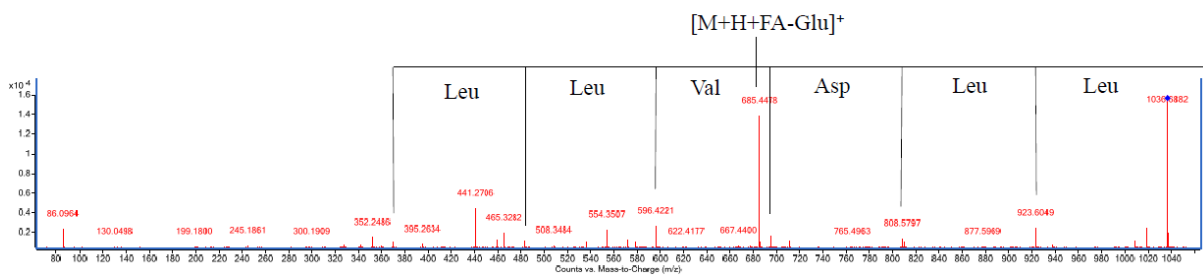

**Fig S4.** MS/MS fragmentation for surfactin C.
